# Supplementary material for: A Novel UC Exclusion Diet and Antibiotics for Treatment of Mild to Moderate Pediatric Ulcerative Colitis: A Prospective Open-Label Pilot Study
Source: MDPI journal article supplement (doi:10.3390/nu13113736), 2021-10-23
Supplement: s1 [file s1]

Supplementary materials

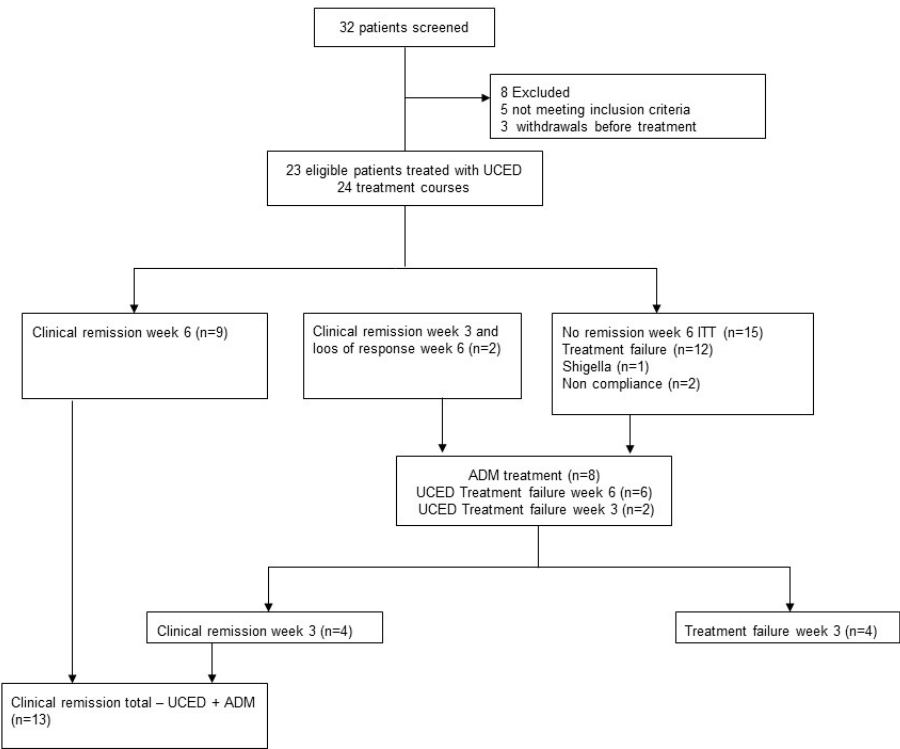

Supplementary Figure S1. Participant flow diagram

Supplementary Table S1. A day’s sample menu of phase 1 UCED

|                 |                                                                                                              |
|-----------------|--------------------------------------------------------------------------------------------------------------|
| Breakfast       | Oatmeal with fruits or 2-3 home made rice flour crepes with fruit/or 1 + freshly squeezed orange juice       |
| Morning snack   | 1 apple and rice flour tortilla with avocado                                                                 |
| Lunch           | 1 baked potato (cooked and cooled before used) or cooked green beans                                         |
|                 | Fresh stir-fried chicken breast (200 gr) or chicken balls with pasta and tomatoes sauce                      |
|                 | Mixed vegetable salad                                                                                        |
| Afternoon snack | 1 banana or homemade potato chips (2 potatoes) or fruit sorbet with almonds                                  |
| Dinner          | Spring rolls with vegetables (1 zucchini, ½ red pepper) and small lettuce and tomatoes salad or quinoa salad |
| Night snack     | 1 banana or fruit salad or rice flour pancakes                                                               |
